# Supplementary material for: Faecal microbiota transplant from aged donor mice affects spatial learning and memory via modulating hippocampal synaptic plasticity- and neurotransmission-related proteins in young recipients
Source: PubMed Central journal article supplement (PMC7532115; doi:10.1186/s40168-020-00914-w), 2020-10-01
Supplement: 40168_2020_914_MOESM10_ESM.pdf [file 40168_2020_914_MOESM10_ESM.pdf]

Fatty acids C6-onwards

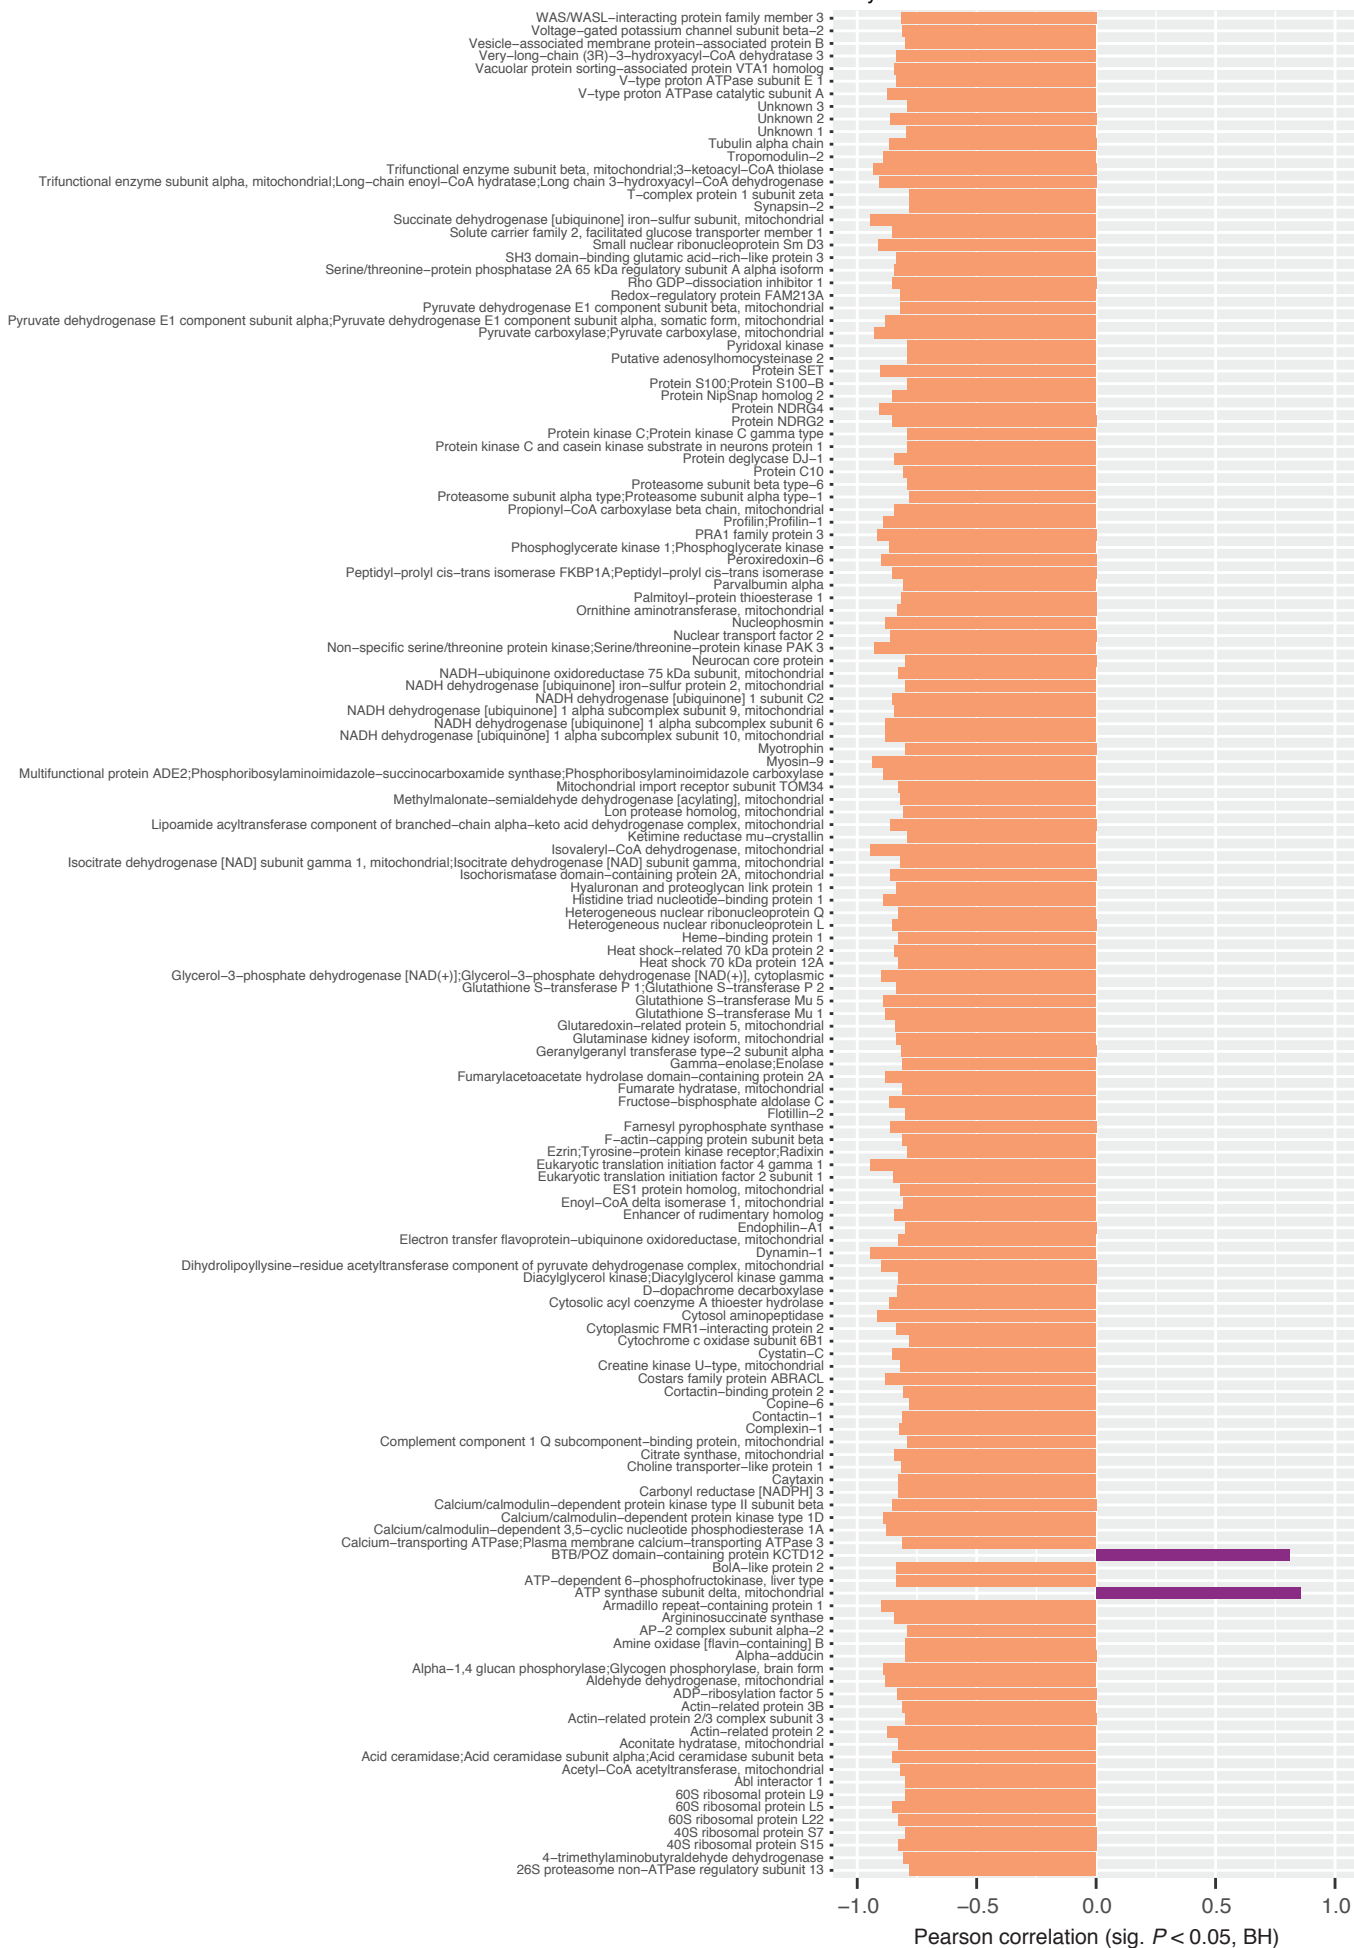

Pearson correlation (sig.  $P < 0.05$ , BH)
